# Supplementary material for: Label-free blood plasma test based on surface-enhanced Raman scattering for tumor stages detection in nasopharyngeal cancer
Source: PubMed Central journal article supplement — Sci Rep. 2014 Apr 23;4:4751. doi: 10.1038/srep04751 (PMC3996462; doi:10.1038/srep04751), 2014-04-23
Supplement: srep04751-s1.pdf [file srep04751-s1.pdf]

## Supplementary information

### Label-free blood plasma test based on surface-enhanced Raman scattering for tumor stages detection in nasopharyngeal cancer

Duo Lin, Jianji Pan, Hao Huang, Guannan Chen, Sufang Qiu, Hong Shi, Weiwei Chen,  
Yun Yu, Shangyuan Feng, Rong Chen

**Table S1.** Clinical information on nasopharyngeal cancer patients

| No. | Age | Sex    | T stage | Pathological type                              | VCA-IgA (s/co) | EA-IgA (s/co) | EBV-DNA (copies/ml) |
|-----|-----|--------|---------|------------------------------------------------|----------------|---------------|---------------------|
| 1   | 44  | male   | T1      | non cornification undifferentiated carcinoma   | 4.05           | 2.02          | $5.59 \times 10^2$  |
| 2   | 65  | male   | T1      | Poorly differentiated squamous cell carcinomas | 1.78           | 0.67          | $6.21 \times 10^2$  |
| 3   | 52  | male   | T1      | non cornification undifferentiated carcinoma   | 2.96           | 0.94          |                     |
| 4   | 45  | male   | T1      | Poorly differentiated squamous cell carcinomas | 4.33           | 0.33          | $5.79 \times 10^2$  |
| 5   | 47  | male   | T1      | non cornification undifferentiated carcinoma   | 2.43           | 0.32          | $3.21 \times 10^3$  |
| 6   | 49  | male   | T1      | non cornification undifferentiated carcinoma   | 4.33           | 1.79          | $3.60 \times 10^2$  |
| 7   | 75  | female | T1      | vesicular nucleus cell carcinoma               | 0.55           | 0.12          | $1.15 \times 10^2$  |
| 8   | 60  | male   | T1      | non cornification undifferentiated carcinoma   | 4.33           | 3.88          |                     |
| 9   | 35  | female | T1      | squamous cell carcinomas                       | 6.07           | 1.5           | $1.29 \times 10^3$  |
| 10  | 49  | male   | T1      | non cornification undifferentiated carcinoma   | 1.16           | 0.25          | $<5.0 \times 10^2$  |
| 11  | 48  | male   | T1      | non cornification undifferentiated carcinoma   | 2.09           | 0.19          | $2.53 \times 10^2$  |
| 12  | 46  | female | T1      | Poorly differentiated squamous cell carcinomas | 2.74           | 0.5           | $2.85 \times 10^2$  |
| 13  | 37  | male   | T1      | non cornification undifferentiated carcinoma   | 2.28           | 0.13          | $8.93 \times 10^2$  |
| 14  | 43  | female | T1      | non cornification undifferentiated carcinoma   | 4.62           | 4.44          | $1.11 \times 10^2$  |
| 15  | 71  | male   | T1      | non cornification undifferentiated carcinoma   | 5.51           | 4.45          | $1.07 \times 10^3$  |
| 16  | 43  | male   | T1      | non cornification undifferentiated carcinoma   | 0.17           | 0.75          | $1.86 \times 10^3$  |
| 17  | 50  | female | T1      | non cornification                              | 3.83           | 1.44          | $<5.0 \times 10^2$  |

|    |    |        |    |                                                 |      |      |                    |
|----|----|--------|----|-------------------------------------------------|------|------|--------------------|
|    |    |        |    | undifferentiated carcinoma                      |      |      |                    |
| 18 | 56 | male   | T1 | non cornification<br>undifferentiated carcinoma | 0.92 | 0.32 | $<5.0 \times 10^2$ |
| 19 | 39 | male   | T1 | non cornification<br>undifferentiated carcinoma | 4.55 | 2.47 | $1.33 \times 10^3$ |
| 20 | 48 | male   | T1 | non cornification<br>undifferentiated carcinoma | 3.77 | 3.8  | $1.27 \times 10^3$ |
| 21 | 37 | male   | T1 | non cornification<br>undifferentiated carcinoma | 4.27 | 2.94 |                    |
| 22 | 45 | male   | T1 | non cornification<br>undifferentiated carcinoma | 2.12 | 0.45 | $1.23 \times 10^3$ |
| 23 | 43 | male   | T1 | non cornification<br>undifferentiated carcinoma | 3.11 | 1.01 | $2.27 \times 10^3$ |
| 24 | 50 | female | T1 | non cornification<br>undifferentiated carcinoma | 2.09 | 0.66 | $1.03 \times 10^3$ |
| 25 | 52 | male   | T1 | non cornification<br>undifferentiated carcinoma | 1.11 | 0.45 | $1.53 \times 10^2$ |
| 26 | 45 | male   | T4 | non cornification<br>undifferentiated carcinoma |      |      | $7.23 \times 10^2$ |
| 27 | 42 | male   | T3 | non cornification<br>differentiated carcinoma   | 2.01 | 0.27 | $1.53 \times 10^2$ |
| 28 | 44 | male   | T3 | non cornification<br>undifferentiated carcinoma | 5.19 | 4.84 | $<5.0 \times 10^2$ |
| 29 | 36 | male   | T2 | non cornification<br>undifferentiated carcinoma | 3.47 | 0.33 | $<5.0 \times 10^2$ |
| 30 | 57 | female | T3 | non cornification<br>undifferentiated carcinoma | 1.82 | 0.37 | $5.10 \times 10^2$ |
| 31 | 65 | male   | T4 | non cornification<br>undifferentiated carcinoma | 0.91 | 0.22 | $2.19 \times 10^2$ |
| 32 | 38 | male   | T2 | non cornification<br>undifferentiated carcinoma | 2.65 | 0.1  | $<5.0 \times 10^2$ |
| 33 | 53 | female | T4 | non cornification<br>undifferentiated carcinoma | 4.79 | 3.79 | $9.83 \times 10^3$ |
| 34 | 52 | male   | T4 | cornification squamous<br>cell carcinomas       | 2.67 | 2.17 | $<5.0 \times 10^2$ |
| 35 | 52 | male   | T2 | non cornification<br>undifferentiated carcinoma | 5.63 | 1.7  | $5.07 \times 10^2$ |
| 36 | 56 | male   | T4 | non cornification<br>undifferentiated carcinoma | 2.6  | 0.73 | $1.16 \times 10^4$ |
| 37 | 40 | male   | T2 | non cornification<br>undifferentiated carcinoma | 6.31 | 1.78 | $2.68 \times 10^3$ |
| 38 | 62 | male   | T2 | non cornification<br>undifferentiated carcinoma | 3.9  | 1.2  | $<5.0 \times 10^2$ |

|    |    |        |    |                                                   |      |      |                    |
|----|----|--------|----|---------------------------------------------------|------|------|--------------------|
| 39 | 38 | male   | T3 | non cornification<br>undifferentiated carcinoma   | 0.65 | 0.25 | $1.73 \times 10^3$ |
| 40 | 41 | male   | T4 | non cornification<br>undifferentiated carcinoma   | 1.9  | 0.15 | $2.95 \times 10^3$ |
| 41 | 36 | male   | T2 | non cornification<br>differentiated carcinoma     | 4.66 | 5.13 | $1.57 \times 10^4$ |
| 42 | 61 | female | T4 | non cornification<br>undifferentiated carcinoma   | 1.79 | 0.42 | $3.71 \times 10^3$ |
| 43 | 42 | male   | T4 | Poorly differentiated<br>squamous cell carcinomas | 1.09 | 1    | $5.0 \times 10^2$  |
| 44 | 44 | male   | T4 | non cornification<br>undifferentiated carcinoma   | 1.54 | 0.22 | $1.84 \times 10^3$ |
| 45 | 73 | female | T4 | non cornification<br>undifferentiated carcinoma   | 3.9  | 0.13 | $<5.0 \times 10^2$ |
| 46 | 69 | male   | T3 | Poorly differentiated<br>squamous cell carcinomas | 4.96 | 2.56 | $<5.0 \times 10^2$ |
| 47 | 25 | male   | T4 | non cornification<br>undifferentiated carcinoma   | 3.8  | 0.22 | $<5.0 \times 10^2$ |
| 48 | 45 | male   | T3 | non cornification<br>undifferentiated carcinoma   | 4.81 | 5.82 | $<5.0 \times 10^2$ |
| 49 | 47 | male   | T4 | non cornification<br>carcinoma                    | 1.54 | 5.43 | $1.15 \times 10^4$ |
| 50 | 42 | male   | T2 | non cornification<br>undifferentiated carcinoma   | 4.37 | 0.55 | $1.1 \times 10^3$  |
| 51 | 43 | male   | T4 | non cornification<br>carcinoma                    | 5.48 | 1.13 | $<5.0 \times 10^2$ |
| 52 | 55 | male   | T4 | non cornification<br>squamous cell carcinomas     | 1.44 | 0.41 | $1.5 \times 10^1$  |
| 53 | 39 | male   | T2 | non cornification<br>undifferentiated carcinoma   | 2.06 | 0.49 | $<5.0 \times 10^2$ |
| 54 | 65 | male   | T4 | non cornification<br>undifferentiated carcinoma   | 2.32 | 0.76 | $2.01 \times 10^4$ |
| 55 | 40 | male   | T4 | non cornification<br>undifferentiated carcinoma   | 3.07 | 2.89 | $1.16 \times 10^3$ |
| 56 | 50 | male   | T3 | non cornification<br>undifferentiated carcinoma   | 7.24 | 5.41 | $2.47 \times 10^2$ |
| 57 | 57 | male   | T4 | Poorly differentiated<br>squamous cell carcinomas | 0.69 | 0.1  | $<5.0 \times 10^2$ |
| 58 | 42 | female | T4 | non cornification<br>undifferentiated carcinoma   | 5.62 | 2.27 | $1.49 \times 10^2$ |
| 59 | 35 | female | T3 | non cornification<br>undifferentiated carcinoma   | 7.24 | 5.4  | $<5.0 \times 10^2$ |
| 60 | 52 | female | T3 | non cornification<br>undifferentiated carcinoma   | 2.35 | 0.11 | $2.19 \times 10^4$ |

|    |    |        |    |                                                   |      |       |                    |
|----|----|--------|----|---------------------------------------------------|------|-------|--------------------|
| 61 | 37 | male   | T3 | non cornification<br>undifferentiated carcinoma   | 5.33 | 0.16  | $1.93 \times 10^4$ |
| 62 | 22 | female | T2 | non cornification<br>undifferentiated carcinoma   | 7.24 | 1.84  | $1.37 \times 10^2$ |
| 63 | 54 | male   | T4 | cornification squamous<br>cell carcinomas         | 6.28 | 5.41  | $2.68 \times 10^4$ |
| 64 | 26 | male   | T2 | non cornification<br>undifferentiated carcinoma   | 4.86 | 0.98  | $3.28 \times 10^3$ |
| 65 | 68 | female | T4 | non cornification<br>undifferentiated carcinoma   | 5.48 | 4.05  | $1.23 \times 10^3$ |
| 66 | 59 | male   | T2 | non cornification<br>carcinoma                    | 4.25 | 0.58  |                    |
| 67 | 43 | male   | T3 | non cornification<br>undifferentiated carcinoma   | 1.38 | 0.185 | $2.01 \times 10^5$ |
| 68 | 36 | female | T3 | non cornification<br>undifferentiated carcinoma   | 1.2  | 0.09  |                    |
| 69 | 54 | male   | T3 | non cornification<br>undifferentiated carcinoma   | 7.25 | 5.06  | $1.96 \times 10^3$ |
| 70 | 66 | male   | T3 | non cornification<br>carcinoma                    | 5.01 | 0.86  | $3.00 \times 10^3$ |
| 71 | 57 | male   | T4 | non cornification<br>undifferentiated carcinoma   | 5.64 | 0.76  | $1.06 \times 10^2$ |
| 72 | 34 | male   | T2 | non cornification<br>undifferentiated carcinoma   | 5.9  | 3.24  | $<5.0 \times 10^2$ |
| 73 | 22 | male   | T3 | non cornification<br>undifferentiated carcinoma   |      |       |                    |
| 74 | 59 | male   | T3 | non cornification<br>undifferentiated carcinoma   | 5.91 | 0.11  | $7.91 \times 10^2$ |
| 75 | 58 | male   | T4 | non cornification<br>undifferentiated carcinoma   | 3.05 | 2.01  | $<5.0 \times 10^2$ |
| 76 | 55 | male   | T4 | non cornification<br>undifferentiated carcinoma   | 4.82 | 2.66  | $1.12 \times 10^2$ |
| 77 | 66 | male   | T3 | non cornification<br>differentiated carcinoma     | 1.58 | 2.89  | $<5.0 \times 10^2$ |
| 78 | 51 | male   | T4 | non cornification<br>differentiated carcinoma     | 2.74 | 3.06  | $2.40 \times 10^4$ |
| 79 | 46 | male   | T2 | non cornification<br>undifferentiated carcinoma   | 1.94 | 0.14  | $<5.0 \times 10^2$ |
| 80 | 37 | female | T2 | non cornification<br>undifferentiated carcinoma   | 4.39 | 2.88  | $<5.0 \times 10^2$ |
| 81 | 59 | male   | T4 | Poorly differentiated<br>squamous cell carcinomas | 5.81 | 0.69  | $1.39 \times 10^2$ |
| 82 | 54 | female | T4 | non cornification<br>undifferentiated carcinoma   | 3.5  | 0.23  | $<5.0 \times 10^2$ |

|     |    |        |    |                                                   |        |        |                    |
|-----|----|--------|----|---------------------------------------------------|--------|--------|--------------------|
| 83  | 32 | male   | T2 | non cornification<br>undifferentiated carcinoma   | 4.716  | 0.255  | $<5.0 \times 10^2$ |
| 84  | 60 | male   | T3 | non cornification<br>undifferentiated carcinoma   | 6.47   | 4.83   | $<5.0 \times 10^2$ |
| 85  | 74 | male   | T4 | non cornification<br>undifferentiated carcinoma   | 0.92   | 0.15   | $<5.0 \times 10^2$ |
| 86  | 57 | male   | T3 | Poorly differentiated<br>squamous cell carcinomas | 3.09   | 3.84   | $4.83 \times 10^3$ |
| 87  | 39 | female | T3 | non cornification<br>undifferentiated carcinoma   | 4.75   | 0.57   | $4.02 \times 10^2$ |
| 88  | 65 | male   | T2 | non cornification<br>carcinoma                    | 2.93   | 0.35   | $4.27 \times 10^3$ |
| 89  | 42 | male   | T4 | non cornification<br>differentiated carcinoma     | $<0.8$ | $<0.8$ | $<5.0 \times 10^2$ |
| 90  | 60 | male   | T2 | non cornification<br>differentiated carcinoma     |        |        | $8.98 \times 10^2$ |
| 91  | 42 | female | T4 | non cornification<br>differentiated carcinoma     | 4.23   | $<0.8$ | $8.54 \times 10^2$ |
| 92  | 15 | male   | T4 | non cornification<br>differentiated carcinoma     | 5.38   | 4.02   | $<5.0 \times 10^2$ |
| 93  | 59 | male   | T4 | non cornification<br>differentiated carcinoma     | 2.83   | 0.47   | $<5.0 \times 10^2$ |
| 94  | 27 | male   | T2 | non cornification<br>differentiated carcinoma     | 1.49   | 0.13   | $<5.0 \times 10^2$ |
| 95  | 64 | female | T4 | non cornification<br>differentiated carcinoma     | 7.25   | 3      | $2.28 \times 10^5$ |
| 96  | 43 | female | T3 | non cornification<br>undifferentiated carcinoma   |        |        |                    |
| 97  | 34 | male   | T2 | non cornification<br>undifferentiated carcinoma   | 3.91   | 3.56   |                    |
| 98  | 67 | male   | T2 | non cornification<br>undifferentiated carcinoma   | 3.91   | 0.67   | $9.10 \times 10^2$ |
| 99  | 43 | male   | T3 | non cornification<br>undifferentiated carcinoma   | 1.78   | 0.16   | $<5.0 \times 10^2$ |
| 100 | 57 | male   | T3 | non cornification<br>undifferentiated carcinoma   | 1.6    | 0.77   | $8.10 \times 10^2$ |

**Table S2.** Classification results of blood SERS prediction of the three pathology groups using SERS peak intensity.

| Peak (cm <sup>-1</sup> ) | Diagnostic combinations |     |       | Predicted parameters |             |       |
|--------------------------|-------------------------|-----|-------|----------------------|-------------|-------|
|                          |                         |     |       | Sensitivity          | Specificity | AUC   |
| 492                      | T1                      | vs. | N     | 68%                  | 68.3%       | 0.757 |
|                          | T2-T4                   | vs. | N     | 65.3%                | 68.3%       | 0.738 |
| 725                      | T1                      | vs. | N     | 88%                  | 63.3%       | 0.811 |
|                          | T2-T4                   | vs. | N     | 64%                  | 60%         | 0.688 |
| 1003                     | T1                      | vs. | N     | 88%                  | 85%         | 0.938 |
|                          | T2-T4                   | vs. | N     | 84%                  | 85%         | 0.909 |
| 1068                     | T1                      | vs. | N     | 64%                  | 61.7%       | 0.646 |
|                          | T2-T4                   | vs. | N     | 72%                  | 75%         | 0.790 |
| 1131                     | T1                      | vs. | T2-T4 | 68%                  | 65.3%       | 0.658 |
|                          | T1                      | vs. | N     | 84%                  | 73.3%       | 0.800 |
|                          | T2-T4                   | vs. | N     | 73.3%                | 76.7%       | 0.803 |
| 1208                     | T1                      | vs. | N     | 76%                  | 76.7%       | 0.801 |
|                          | T2-T4                   | vs. | N     | 84%                  | 76.7%       | 0.862 |
| 1402                     | T2-T4                   | vs. | N     | 77.3%                | 75%         | 0.839 |
|                          | T1                      | vs. | T2-T4 | 69.3%                | 72%         | 0.725 |
| 1655                     | T2-T4                   | vs. | N     | 73.3%                | 81.7%       | 0.839 |

T1: Tumor 1 stage nasopharyngeal cancer subject; T2-T4: Tumor 2-4 stage nasopharyngeal cancer subject; N: healthy volunteer subject; AUC: The integration area under the ROC curves.

**Table S3** Classification results of blood SERS prediction of samples belonging to one pathology type using PCA-LDA method.

| Pathology type                                    | Predicted parameters |                  |       |
|---------------------------------------------------|----------------------|------------------|-------|
|                                                   | Sensitivity          | Specificity      | AUC   |
| T1 stage cancer<br>(12 samples vs. 13 samples)    | 50%<br>(6/12)        | 30.8%<br>(4/13)  | 0.558 |
| T2-T4 stage cancer<br>(37 samples vs. 38 samples) | 45.9%<br>(17/37)     | 44.7%<br>(17/38) | 0.564 |
| Normal<br>(30 samples vs. 30 samples)             | 63.3%<br>(19/30)     | 46.7%<br>(14/30) | 0.608 |

AUC: The integration areas under the ROC curve.

**Table S4** Classification results of blood SERS prediction of negative control (rhinitis patients) and previous three pathology groups using PCA-LDA method.

| Diagnostic combinations |     |                       | Predicted parameters |                |       |
|-------------------------|-----|-----------------------|----------------------|----------------|-------|
|                         |     |                       | Sensitivity          | Specificity    | AUC   |
| Rhinitis                | vs. | Normal                | 30%<br>(3/10)        | 55%<br>(33/60) | 0.604 |
| Rhinitis                | vs. | T1 stage<br>cancer    | 80%<br>(8/10)        | 80%<br>(20/25) | 0.936 |
| Rhinitis                | vs. | T2-T4 stage<br>cancer | 90%<br>(9/10)        | 92%<br>(69/75) | 0.976 |

AUC: The integration areas under the ROC curve.
